## Correction: Inhibition of neddylation regulates dendritic cell functions *via* Deptor accumulation driven mTOR inactivation

Mengmeng Cheng<sup>1,\*</sup>, Shurong Hu<sup>1,\*</sup>, Zhengting Wang<sup>1</sup>, Yaofei Pei<sup>2</sup>, Rong Fan<sup>1</sup>, Xiqiang Liu<sup>2</sup>, Lei Wang<sup>1</sup>, Jie Zhou<sup>1</sup>, Sichang Zheng<sup>1</sup>, Tianyu Zhang<sup>1</sup>, Yun Lin<sup>1</sup>, Maochen Zhang<sup>1</sup>, Ran Tao<sup>3</sup> and Jie Zhong<sup>1</sup>

<sup>1</sup> Department of Gastroenterology, Ruijin Hospital, Shanghai Jiao Tong University School of Medicine, Shanghai, China

<sup>2</sup> Department of Surgery, Ruijin Hospital, Shanghai Jiao Tong University School of Medicine, Shanghai, China

<sup>3</sup> Department of Hepatobiliary-Pancreatic Surgery, Zhejiang Provincial People's Hospital, Hangzhou, China

\* These authors have contributed equally to this work

**Published:** December 18, 2018

**Copyright:** Cheng et al. This is an open-access article distributed under the terms of the Creative Commons Attribution License 3.0 (CC BY 3.0), which permits unrestricted use, distribution, and reproduction in any medium, provided the original author and source are credited.

**This article has been corrected:** The correct Grant support information is given below:

### GRANT SUPPORT

We thank Tonghui Ma for his technical help and Xinyu Liu for helpful discussions. This work was supported by Science & Technology department of Shanghai (13411950901), Zhejiang Provincial Nature and Science Foundation (NSF) grant for "Outstanding Youth"(No.LR15H100001 to RT).

Original article: Oncotarget. 2016; 7:35643-35654. <https://doi.org/10.18632/oncotarget.9543>
